# Supplementary material for: Applying Self-Regulated Learning and Self-Determination Theory to Optimize the Performance of a Concert Cellist
Source: PubMed Central journal article supplement (PMC7067924; doi:10.3389/fpsyg.2020.00385), 2020-03-06
Supplement: Data_Sheet_1.pdf [file Data_Sheet_1.pdf]

## Appendix 1 – List of concerts, practicing days, programs and keyboards employed

| Year | Concert Day and Place                                                                           | Pre-Concert Practicing Days                                         | Program                                                                                                                     | Keyboard employed                                                                                                                  |
|------|-------------------------------------------------------------------------------------------------|---------------------------------------------------------------------|-----------------------------------------------------------------------------------------------------------------------------|------------------------------------------------------------------------------------------------------------------------------------|
| 2016 | 4 October / <i>Sellosali</i> Concert Series, Espoo (Finland)                                    | 29.7; 5.8; 12.8; 19.8; 26.8; 2.9; 9.9; 16.9; 26.9; 30.9             | -Beethoven: Sonata Op. 5, N.1; Variations WoO45; Variations Op. 66<br>-Mendelssohn: Variations Concertantes; Sonata D Major | -Replica of an Anton Walter fortepiano from 1795, built by Michael Walker, Germany<br>-Original Clementi fortepiano (London, 1828) |
|      | 1 November / <i>Kloostri Ait</i> , Tallinn (Estonia) & broadcasted by Klassikaraadio in Estonia | 6.10; 10.10; 13.10; 15.10; 17.10; 20.10; 22.10; 24.10; 27.10; 29.10 | -Beethoven: Sonata Op. 5 N. 1; Variations WoO45; Variations Op. 66                                                          | -Replica of an Anton Walter fortepiano                                                                                             |
| 2017 | 24 May / <i>Nordic Historical Keyboard Festival</i> , Kuopio (Finland)                          | 17.3; 24.3; 31.3; 7.4; 14.4; 21.4; 28.4; 5.5; 12.5; 19.5            | -Beethoven: Sonata Op. 5, N.2; Variations WoO45; Variations WoO46; Variations Op. 66                                        | -Replica of a five-octave Stein fortepiano made by Pentti Pelto                                                                    |
|      | 12 September / <i>Aino Ackté Festival</i> , Helsinki (Finland)                                  | 7.7; 14.7; 21.7; 28.7; 4.8; 11.8; 18.8; 25.8; 1.9; 8.9              | -Beethoven: Sonata Op. 5 N.2; Variations WoO46<br>-Mendelssohn: Variations Concertantes; Sonata D Major                     | -Replica of a Graf's fortepiano from 1820, built by Rodney Regier, United States                                                   |
|      | 28 November / <i>Uusi Paviljonki</i> Concert Series, Kauniainen (Finland)                       | 22.9; 29.9; 6.10; 13.10; 20.10; 27.10; 3.11; 10.11; 17.11; 24.11    | -Mendelssohn complete piano and cello works                                                                                 | -Original Érard piano (Paris, 1862), serial number 32602 (AAA-a""), una-corda and damper pedals                                    |
| 2018 | 18 April / <i>Beethoven Research Center</i> , San José, California (USA)                        | 9.2; 16.2; 23.2; 2.3; 9.3; 16.3; 23.3; 30.3; 6.4; 13.4              | -Beethoven: Sonata Op.5, N.1; Sonata Op. 5, N.2; Variations WoO45                                                           | -Original Broadwood fortepiano from 1823 (CC to f"")                                                                               |
|      | 15 July / <i>Piano Salon Christophori</i> , Berlin (Germany)                                    | 11.5; 18.5; 25.5; 1.6; 8.6; 15.6; 22.6; 29.6; 6.7; 13.7             | -Mendelssohn complete piano and cello works                                                                                 | -Original Érard piano from 1854                                                                                                    |
|      | 8 August / <i>BRQ Vantaa Festival</i> , Vantaa (Finland)                                        | 17.7; 19.7; 21.7; 24.7; 26.7; 28.7; 31.7; 2.8; 4.8; 6.8             | -Mendelssohn complete piano and cello works                                                                                 | -Original Érard piano (Paris, 1862), serial number 32602 (AAA-a""), una-corda and damper pedals                                    |
|      | 25 October / <i>Philharmonic Society's Small Hall</i> , Moscow (Russia)                         | 17.8; 24.8; 31.8; 7.9; 14.9; 21.9; 28.9; 5.10; 12.10; 19.10         | -Beethoven: Sonata Op. 5 N.1<br>-Mendelssohn: Albumblatt, Lied ohne Worte, Sonata D Major                                   | -Replica of an Érard piano from 1840                                                                                               |
|      | 16-17 August and 1-2 September 2018 / CD Recording, <i>Alba Records</i> (Finland)               | 18.6; 25.6; 2.7; 9.7; 16.7; 23.7; 30.7; 13.8; 20.8; 27.8            | -Mendelssohn complete piano and cello works                                                                                 | -Original Érard piano (Paris, 1862), serial number 32602 (AAA-a""), una-corda and damper pedals                                    |
