# Supplementary material for: Applying Self-Regulated Learning and Self-Determination Theory to Optimize the Performance of a Concert Cellist
Source: PubMed Central journal article supplement (PMC7067924; doi:10.3389/fpsyg.2020.00385), 2020-03-06
Supplement: Data_Sheet_4.pdf [file Data_Sheet_4.pdf]

#### Appendix 4 – Scores for the five types of motivation

|                               | Event | Average score pre-practice | Minimum score pre-practice | Maximum score pre-practice | Average score post-practice | Minimum score post-practice | Maximum score post-practice |
|-------------------------------|-------|----------------------------|----------------------------|----------------------------|-----------------------------|-----------------------------|-----------------------------|
| <b>Intrinsic Motivation</b>   | 1     | 6.4                        | 5                          | 9                          | 7.7                         | 6                           | 10                          |
|                               | 2     | 6.3                        | 5                          | 9                          | 7.8                         | 6                           | 10                          |
|                               | 3     | 6.6                        | 5                          | 9                          | 6.9                         | 6                           | 10                          |
|                               | 4     | 7.1                        | 6                          | 9                          | 7.2                         | 5                           | 9                           |
|                               | 5     | 7.7                        | 7                          | 9                          | 8                           | 6                           | 9                           |
|                               | 6     | 7.5                        | 6                          | 8                          | 8.2                         | 7                           | 9                           |
|                               | 7     | 7.9                        | 7                          | 9                          | 8.3                         | 7                           | 10                          |
|                               | 8     | 8                          | 7                          | 9                          | 8.6                         | 7                           | 10                          |
|                               | 9     | 7.9                        | 7                          | 9                          | 8.4                         | 7                           | 10                          |
|                               | 10    | 8.8                        | 8                          | 10                         | 9.2                         | 8                           | 10                          |
| <b>Integrated Regulation</b>  | 1     | 0.9                        | 0                          | 2                          | 1.3                         | 0                           | 2                           |
|                               | 2     | 0.7                        | 0                          | 2                          | 1.1                         | 0                           | 2                           |
|                               | 3     | 0.9                        | 0                          | 2                          | 0.9                         | 0                           | 2                           |
|                               | 4     | 1.1                        | 0                          | 2                          | 1.1                         | 0                           | 2                           |
|                               | 5     | 1.4                        | 0                          | 2                          | 1.4                         | 0                           | 2                           |
|                               | 6     | 1.3                        | 0                          | 2                          | 1.5                         | 0                           | 2                           |
|                               | 7     | 1.1                        | 0                          | 2                          | 1.8                         | 1                           | 2                           |
|                               | 8     | 1.6                        | 1                          | 2                          | 1.8                         | 1                           | 2                           |
|                               | 9     | 1.5                        | 0                          | 2                          | 1.9                         | 1                           | 2                           |
|                               | 10    | 2                          | 2                          | 2                          | 1.9                         | 1                           | 2                           |
| <b>Identified Regulation</b>  | 1     | 0.7                        | 0                          | 2                          | 0.9                         | 0                           | 2                           |
|                               | 2     | 0.6                        | 0                          | 2                          | 1                           | 0                           | 2                           |
|                               | 3     | 0.5                        | 0                          | 2                          | 0.9                         | 0                           | 2                           |
|                               | 4     | 0.7                        | 0                          | 2                          | 0.9                         | 0                           | 2                           |
|                               | 5     | 1.1                        | 0                          | 2                          | 1.3                         | 0                           | 2                           |
|                               | 6     | 1.1                        | 0                          | 2                          | 1.5                         | 0                           | 2                           |
|                               | 7     | 0.9                        | 0                          | 2                          | 1.6                         | 0                           | 2                           |
|                               | 8     | 1.4                        | 0                          | 2                          | 1.6                         | 1                           | 2                           |
|                               | 9     | 1.3                        | 0                          | 2                          | 1.7                         | 1                           | 2                           |
|                               | 10    | 1.9                        | 1                          | 2                          | 1.9                         | 1                           | 2                           |
| <b>Introjected Regulation</b> | 1     | 1                          | 0                          | 2                          | 1.6                         | 0                           | 2                           |
|                               | 2     | 0.8                        | 0                          | 2                          | 1.2                         | 0                           | 2                           |
|                               | 3     | 1                          | 0                          | 2                          | 1                           | 0                           | 2                           |
|                               | 4     | 1.4                        | 0                          | 2                          | 1.4                         | 0                           | 2                           |
|                               | 5     | 1.6                        | 0                          | 2                          | 1.6                         | 0                           | 2                           |
|                               | 6     | 1.5                        | 0                          | 2                          | 1.8                         | 0                           | 2                           |
|                               | 7     | 1.2                        | 0                          | 2                          | 2                           | 2                           | 2                           |
|                               | 8     | 2                          | 2                          | 2                          | 2                           | 2                           | 2                           |
|                               | 9     | 1.9                        | 1                          | 2                          | 2                           | 2                           | 2                           |
|                               | 10    | 2                          | 2                          | 2                          | 2                           | 2                           | 2                           |
| <b>External Regulation</b>    | 1     | 8.5                        | 5                          | 10                         | 5.7                         | 5                           | 8                           |
|                               | 2     | 8.1                        | 5                          | 10                         | 5.6                         | 5                           | 7                           |
|                               | 3     | 7.4                        | 5                          | 8                          | 6.8                         | 5                           | 8                           |
|                               | 4     | 7.0                        | 5                          | 9                          | 6.0                         | 5                           | 9                           |
|                               | 5     | 6.8                        | 5                          | 9                          | 6.0                         | 5                           | 7                           |
|                               | 6     | 6.4                        | 5                          | 7                          | 5.7                         | 5                           | 7                           |
|                               | 7     | 6.1                        | 5                          | 7                          | 5.5                         | 5                           | 7                           |
|                               | 8     | 5.8                        | 5                          | 7                          | 5.2                         | 5                           | 6                           |
|                               | 9     | 5.6                        | 5                          | 6                          | 5.1                         | 5                           | 6                           |
|                               | 10    | 5.2                        | 5                          | 6                          | 5.0                         | 5                           | 5                           |
